# Supplementary material for: SHAPE Selection (SHAPES) enrich for RNA structure signal in SHAPE sequencing-based probing data
Source: PubMed Central journal article supplement (PMC4408784; doi:10.1261/rna.047068.114), 2015-05
Supplement: supp_047068.114_SuppMaterial.pdf [file supp_047068.114_SuppMaterial.pdf]

Supplementary information accompanying the paper:

## **SHAPE Selection (SHAPES) enrich for RNA structure signal in SHAPE sequencing based probing data**

Line Dahl Poulsen<sup>1</sup>, Lukasz Jan Kielpinski<sup>1</sup>, Sofie Salama<sup>2</sup>, Anders Krogh<sup>1</sup>, Jeppe Vinther<sup>1,\*</sup>,

<sup>1</sup>Department of Biology, University of Copenhagen, Ole Maaløes Vej 5, DK-2200 Copenhagen N, Denmark

<sup>2</sup>Center for Biomolecular Science and Engineering, and Howard Hughes Medical Institute, University of California Santa Cruz, Santa Cruz, California 95064, United States of America

### **CONTENT**

Supplementary figure 1

Supplementary table 1

**Supplementary Figure 1.** SHAPES reactivity values from the NPJA selected sample shown on the E. coli 16S rRNA secondary structure. White positions corresponds to no data.

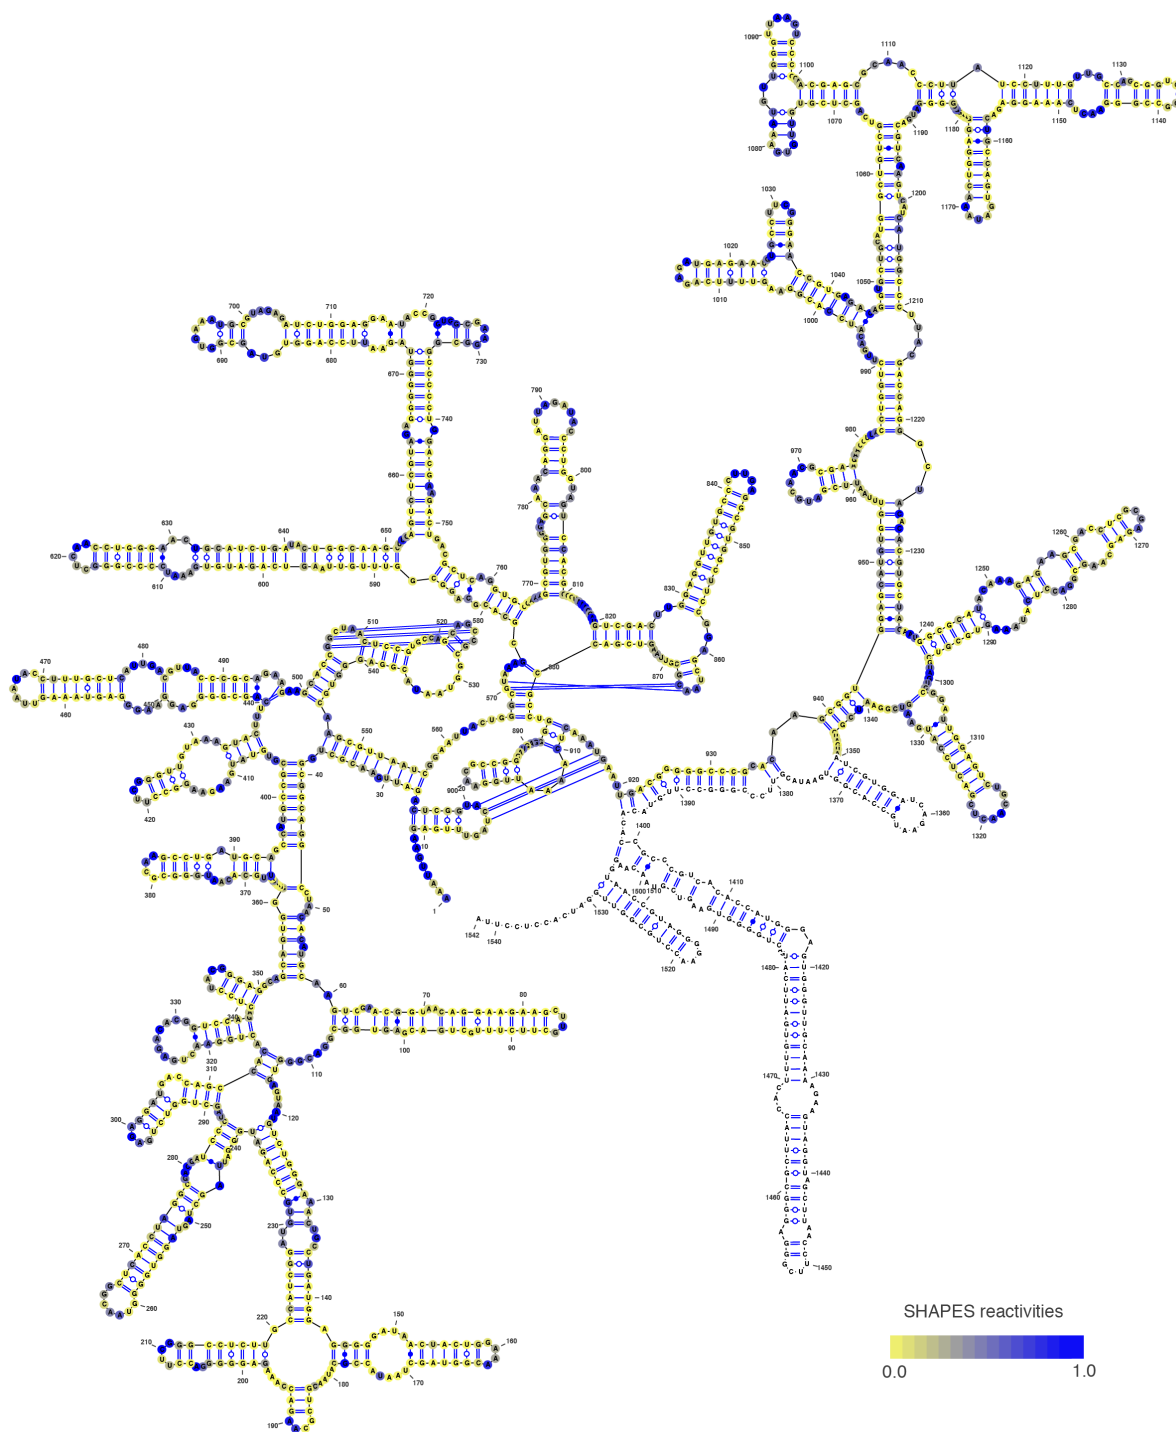

**Supplementary Table 1.** Oligonucleotides used in the study

| Oligonucleotide name         | Oligonucleotide sequence (5'- to 3'-direction)                        |
|------------------------------|-----------------------------------------------------------------------|
| <b>RT_structure_cassette</b> | AGACGTGTGCTCTTCCGATCTGAACCGGACCGAAGCCCG                               |
| <b>RT_random_primer</b>      | AGACGTGTGCTCTTCCGATCTNNNNNNNNNS                                       |
| <b>Ligation_adapter</b>      | PHO-AGATCGGAAGAGCGTCGTGTAGGGAAAGAGTGT-3NHC3                           |
| <b>PCR_forward</b>           | AATGATACGGCGACCACCGAGATCTACACTCTTTCCCTACACGACGCT                      |
| <b>PCR_reverse_index.1</b>   | CAAGCAGAAGACGGCATAACGAGATCGTGATGTGACTGGAGTTCAGACGTGT<br>GCTCTTCCGATCT |
| <b>PCR_reverse_index.2</b>   | CAAGCAGAAGACGGCATAACGAGATACATCGGTGACTGGAGTTCAGACGTGT<br>GCTCTTCCGATCT |
| <b>PCR_reverse_index.5</b>   | CAAGCAGAAGACGGCATAACGAGATCACTGTGTGACTGGAGTTCAGACGTGT<br>GCTCTTCCGATCT |
| <b>PCR_reverse_index.6</b>   | CAAGCAGAAGACGGCATAACGAGATATTGGCGTGACTGGAGTTCAGACGTGT<br>GCTCTTCCGATCT |
| <b>PCR_reverse_index.11</b>  | CAAGCAGAAGACGGCATAACGAGATGTAGCCGTGACTGGAGTTCAGACGTGT<br>GCTCTTCCGATCT |
| <b>PCR_reverse_index.12</b>  | CAAGCAGAAGACGGCATAACGAGATTACAAGGTGACTGGAGTTCAGACGTGT<br>GCTCTTCCGATCT |
| <b>PCR_reverse_index.14</b>  | CAAGCAGAAGACGGCATAACGAGATGGAAGTGTGACTGGAGTTCAGACGTGT<br>GCTCTTCCGATCT |
| <b>PCR_reverse_index.15</b>  | CAAGCAGAAGACGGCATAACGAGATTGACATGTGACTGGAGTTCAGACGTGT<br>GCTCTTCCGATCT |

Oligonucleotide sequences © 2007-2009 Illumina, Inc. All rights reserved.
